# Supplementary material for: Circulating tumor DNA: current implementation issues and future challenges for clinical utility
Source: publisher site journal article supplement (doi:10.1515/cclm-2023-1157), 2023-12-18
Supplement: Supplementary file 1 [file j_cclm-2023-1157_suppl_002.docx]

**Supplementary Tab1. The top 10 most relevant countries（by corresponding author）on ctDNA research from 2013 to 2022.**

|  | **Articles** | **SCP** | **MCP** | **Freq** | **MCP_Ratio** |
| --- | --- | --- | --- | --- | --- |
| CHINA | 1233 | 1065 | 168 | 0.244 | 0.136 |
| USA | 1094 | 788 | 306 | 0.217 | 0.28 |
| ITALY | 306 | 218 | 88 | 0.061 | 0.288 |
| JAPAN | 248 | 226 | 22 | 0.049 | 0.089 |
| FRANCE | 239 | 174 | 65 | 0.047 | 0.272 |
| GERMANY | 202 | 147 | 55 | 0.04 | 0.272 |
| UNITED KINGDOM | 200 | 100 | 100 | 0.04 | 0.5 |
| SPAIN | 163 | 113 | 50 | 0.032 | 0.307 |
| INDIA | 148 | 120 | 28 | 0.029 | 0.189 |
| AUSTRALIA | 141 | 105 | 36 | 0.028 | 0.255 |
