# Supplementary material for: Circulating tumor DNA: current implementation issues and future challenges for clinical utility
Source: publisher site journal article supplement (doi:10.1515/cclm-2023-1157), 2023-12-18
Supplement: Supplementary file 2 [file j_cclm-2023-1157_suppl_003.docx]

| **Paper**  **Supplementary Tab2. The top 25 most global cited documents on ctDNA research from 2013 to 2022.** | **DOI** | **Total Citations** | **TC per Year** | **Normalized TC** |
| --- | --- | --- | --- | --- |
| BETTEGOWDA C, 2014, SCI TRANSL MED | 10.1126/scitranslmed.3007094 | 2909 | 290.90 | 20.50 |
| VAN CUTSEM E, 2016, ANN ONCOL | 10.1093/annonc/mdw235 | 2051 | 256.38 | 31.36 |
| DAWSON SJ, 2013, N ENGL J MED | 10.1056/NEJMoa1213261 | 1561 | 141.91 | 15.65 |
| COHEN JD, 2018, SCIENCE | 10.1126/science.aar3247 | 1545 | 257.50 | 32.88 |
| DIAZ LA, 2014, J CLIN ONCOL | 10.1200/JCO.2012.45.2011 | 1479 | 147.90 | 10.42 |
| NEWMAN AM, 2014, NAT MED | 10.1038/nm.3519 | 1397 | 139.70 | 9.85 |
| WAN JCM, 2017, NAT REV CANCER | 10.1038/nrc.2017.7 | 1327 | 189.57 | 23.44 |
| CROWLEY E, 2013, NAT REV CLIN ONCOL | 10.1038/nrclinonc.2013.110 | 1169 | 106.27 | 11.72 |
| GOOTENBERG JS, 2017, SCIENCE | 10.1126/science.aam9321 | 1113 | 159.00 | 19.66 |
| SIRAVEGNA G, 2017, NAT REV CLIN ONCOL | 10.1038/nrclinonc.2017.14 | 1065 | 152.14 | 18.81 |
| GARCIA-MURILLAS I, 2015, SCI TRANSL MED | 10.1126/scitranslmed.aab0021 | 954 | 106.00 | 10.84 |
| ABBOSH C, 2017, NATURE | 10.1038/nature22364 | 950 | 135.71 | 16.78 |
| ALIX-PANABIERES C, 2016, CANCER DISCOV | 10.1158/2159-8290.CD-15-1483 | 880 | 110.00 | 13.45 |
| TIE J, 2016, SCI TRANSL MED | 10.1126/scitranslmed.aaf6219 | 812 | 101.50 | 12.41 |
| KIM ST, 2018, NAT MED | 10.1038/s41591-018-0101-z | 769 | 128.17 | 16.36 |
| SIRAVEGNA G, 2015, NAT MED | 10.1038/nm.3870 | 647 | 71.89 | 7.35 |
| NEWMAN AM, 2016, NAT BIOTECHNOL | 10.1038/nbt.3520 | 624 | 78.00 | 9.54 |
| PHALLEN J, 2017, SCI TRANSL MED | 10.1126/scitranslmed.aan2415 | 621 | 88.71 | 10.97 |
| DIENSTMANN R, 2017, NAT REV CANCER | 10.1038/nrc.2016.126 | 555 | 79.29 | 9.80 |
| HEITZER E, 2015, CLIN CHEM | 10.1373/clinchem.2014.222679 | 522 | 58.00 | 5.93 |
| MERKER JD, 2018, J CLIN ONCOL | 10.1200/JCO.2017.76.8671 | 521 | 86.83 | 11.09 |
| CHAUDHURI AA, 2017, CANCER DISCOV | 10.1158/2159-8290.CD-17-0716 | 497 | 71.00 | 8.78 |
| BARDELLI A, 2013, CANCER DISCOV | 10.1158/2159-8290.CD-12-0558 | 493 | 44.82 | 4.94 |
| PANTEL K, 2019, NAT REV CLIN ONCOL | 10.1038/s41571-019-0187-3 | 484 | 96.80 | 13.83 |
| HABER DA, 2014, CANCER DISCOV | 10.1158/2159-8290.CD-13-1014 | 473 | 47.30 | 3.33 |
