# Supplementary material for: Circulating tumor DNA: current implementation issues and future challenges for clinical utility
Source: publisher site journal article supplement (doi:10.1515/cclm-2023-1157), 2023-12-18
Supplement: Supplementary file 3 [file j_cclm-2023-1157_suppl_004.docx]

**Supplementary Tab3. The top 10 most relevant journals on ctDNA research from 2013 to 2022.**

| **Sources** | **Articles** |
| --- | --- |
| CANCERS | 280 |
| FRONTIERS IN ONCOLOGY | 180 |
| CLINICAL CANCER RESEARCH | 154 |
| SCIENTIFIC REPORTS | 89 |
| JCO PRECISION ONCOLOGY | 88 |
| ONCOTARGET | 79 |
| ANNALS OF ONCOLOGY | 66 |
| MOLECULAR ONCOLOGY | 65 |
| PLOS ONE | 65 |
| INTERNATIONAL JOURNAL OF MOLECULAR SCIENCES | 63 |
