# Supplementary material for: Circulating tumor DNA: current implementation issues and future challenges for clinical utility
Source: publisher site journal article supplement (doi:10.1515/cclm-2023-1157), 2023-12-18
Supplement: Supplementary file 4 [file j_cclm-2023-1157_suppl_005.docx]

**Supplementary Tab4. The top 10 journals in the field of ctDNA research based on h-index from 2013 to 2022.**

| **Journal** | **h_index** | **g_index** | **m_index** | **TC** | **NP** | **PY_start** |
| --- | --- | --- | --- | --- | --- | --- |
| CLINICAL CANCER RESEARCH | 49 | 85 | 4.455 | 8032 | 154 | 2013 |
| ANNALS OF ONCOLOGY | 48 | 66 | 4.8 | 8119 | 66 | 2014 |
| ONCOTARGET | 35 | 53 | 3.889 | 3226 | 79 | 2015 |
| JOURNAL OF THORACIC ONCOLOGY | 30 | 40 | 3.333 | 3064 | 40 | 2015 |
| CANCER DISCOVERY | 26 | 30 | 2.364 | 6104 | 30 | 2013 |
| SCIENTIFIC REPORTS | 25 | 42 | 2.273 | 2096 | 89 | 2013 |
| MOLECULAR ONCOLOGY | 24 | 41 | 2.4 | 1852 | 65 | 2014 |
| CANCERS | 23 | 31 | 2.3 | 2623 | 280 | 2014 |
| NATURE COMMUNICATIONS | 23 | 31 | 2.556 | 3061 | 31 | 2015 |
| PLOS ONE | 23 | 46 | 2.091 | 2215 | 65 | 2013 |
