# Supplementary material for: Circulating tumor DNA: current implementation issues and future challenges for clinical utility
Source: publisher site journal article supplement (doi:10.1515/cclm-2023-1157), 2023-12-18
Supplement: Supplementary file 5 [file j_cclm-2023-1157_suppl_006.docx]

**Supplementary Tab5. The top 10 affiliations in the field of ctDNA research from 2013 to 2022.**

| **Affiliation** | **Country** | **Sum** | **2013** | **2014** | **2015** | **2016** | **2017** | **2018** | **2019** | **2020** | **2021** | **2022** |
| --- | --- | --- | --- | --- | --- | --- | --- | --- | --- | --- | --- | --- |
| UNIV TEXAS MD ANDERSON CANC CTR | USA | 392 | 0 | 1 | 11 | 13 | 35 | 62 | 68 | 63 | 69 | 70 |
| STANFORD UNIV | USA | 338 | 0 | 8 | 15 | 40 | 52 | 39 | 15 | 82 | 65 | 22 |
| FUDAN UNIV | China | 261 | 0 | 0 | 0 | 8 | 20 | 7 | 35 | 56 | 65 | 70 |
| MEM SLOAN KETTERING CANC CTR | USA | 261 | 2 | 6 | 9 | 8 | 8 | 27 | 49 | 46 | 42 | 64 |
| JOHNS HOPKINS UNIV | USA | 251 | 3 | 7 | 17 | 15 | 22 | 48 | 49 | 27 | 32 | 31 |
| SHANGHAI JIAO TONG UNIV | China | 193 | 0 | 0 | 0 | 6 | 13 | 14 | 24 | 30 | 57 | 49 |
| SUN YAT SEN UNIV | China | 190 | 3 | 0 | 5 | 7 | 9 | 7 | 22 | 42 | 35 | 60 |
| HARVARD MED SCH | USA | 187 | 0 | 0 | 0 | 7 | 24 | 24 | 24 | 26 | 40 | 42 |
| UNIV MICHIGAN | USA | 164 | 0 | 0 | 0 | 13 | 16 | 29 | 11 | 15 | 35 | 45 |
| UNIV CALIF SAN DIEGO | USA | 158 | 4 | 0 | 3 | 2 | 19 | 37 | 31 | 24 | 24 | 14 |
