# Supplementary material for: Circulating tumor DNA: current implementation issues and future challenges for clinical utility
Source: publisher site journal article supplement (doi:10.1515/cclm-2023-1157), 2023-12-18
Supplement: Supplementary file 6 [file j_cclm-2023-1157_suppl_007.docx]

**Supplementary Tab.6. The top 10 most cited documents of ctDNA and early detection research from 2013 to 2022.**

| **Title** | **Source Title** | **Publication Year** | **DOI** | **Total Citations** |
| --- | --- | --- | --- | --- |
| Detection of Circulating Tumor DNA in Early- and Late-Stage Human Malignancies | SCIENCE TRANSLATIONAL MEDICINE | 2014 | 10.1126/scitranslmed.3007094 | 2909 |
| Detection and localization of surgically resectable cancers with a multi-analyte blood test | SCIENCE | 2018 | 10.1126/science.aar3247 | 1544 |
| An ultrasensitive method for quantitating circulating tumor DNA with broad patient coverage | NATURE MEDICINE | 2014 | 10.1038/nm.3519 | 1397 |
| Liquid biopsy: monitoring cancer-genetics in the blood | NATURE REVIEWS CLINICAL ONCOLOGY | 2013 | 10.1038/nrclinonc.2013.110 | 1169 |
| Mutation tracking in circulating tumor DNA predicts relapse in early breast cancer | SCIENCE TRANSLATIONAL MEDICINE | 2015 | 10.1126/scitranslmed.aab0021 | 954 |
| Phylogenetic ctDNA analysis depicts early-stage lung cancer evolution | NATURE | 2017 | 10.1038/nature22364 | 948 |
| Clinical Applications of Circulating Tumor Cells and Circulating Tumor DNA as Liquid Biopsy | CANCER DISCOVERY | 2016 | 10.1158/2159-8290.CD-15-1483 | 880 |
| Direct detection of early-stage cancers using circulating tumor DNA | SCIENCE TRANSLATIONAL MEDICINE | 2017 | 10.1126/scitranslmed.aan2415 | 620 |
| Circulating Tumor DNA Analysis in Patients With Cancer: American Society of Clinical Oncology and College of American Pathologists Joint Review | JOURNAL OF CLINICAL ONCOLOGY | 2018 | 10.1200/JCO.2017.76.8671 | 521 |
| Early Detection of Molecular Residual Disease in Localized Lung Cancer by Circulating Tumor DNA Profiling | CANCER DISCOVERY | 2017 | 10.1158/2159-8290.CD-17-0716 | 497 |
