# Supplementary material for: Circulating tumor DNA: current implementation issues and future challenges for clinical utility
Source: publisher site journal article supplement (doi:10.1515/cclm-2023-1157), 2023-12-18
Supplement: Supplementary file 7 [file j_cclm-2023-1157_suppl_009.docx]

**Supplementary Tab8. The top 10 most cited documents of ctDNA and MRD research from 2013 to 2022.**

| **Title** | **Journal** | **Publication year** | **DOI** | **Total citations** |
| --- | --- | --- | --- | --- |
| Integrating liquid biopsies into the management of cancer | NATURE REVIEWS CLINICAL ONCOLOGY | 2017 | 10.1038/nrclinonc.2017.14 | 1060 |
| Mutation tracking in circulating tumor DNA predicts relapse in early breast cancer | SCIENCE TRANSLATIONAL MEDICINE | 2015 | 10.1126/scitranslmed.aab0021 | 944 |
| Circulating tumor DNA analysis detects minimal residual disease and predicts recurrence in patients with stage II colon cancer | SCIENCE TRANSLATIONAL MEDICINE | 2016 | 10.1126/scitranslmed.aaf6219 | 805 |
| Liquid biopsy and minimal residual disease - latest advances and implications for cure | NATURE REVIEWS CLINICAL ONCOLOGY | 2019 | 10.1038/s41571-019-0187-3 | 477 |
| Distinct biological subtypes and patterns of genome evolution in lymphoma revealed by circulating tumor DNA | SCIENCE TRANSLATIONAL MEDICINE | 2016 | 10.1126/scitranslmed.aai8545 | 271 |
| Circulating Tumor DNA Analyses as Markers of Recurrence Risk and Benefit of Adjuvant Therapy for Stage III Colon Cancer | JAMA ONCOLOGY | 2019 | 10.1001/jamaoncol.2019.3616 | 247 |
| Circulating tumor DNA and liquid biopsy in oncology | NATURE CANCER | 2020 | 10.1038/s43018-020-0043-5 | 183 |
| DNA Methylation Cancer Biomarkers: Translation to the Clinic | FRONTIERS IN GENETICS | 2019 | 10.3389/fgene.2019.01150 | 183 |
| Clinical Implications of Monitoring Circulating Tumor DNA in Patients with Colorectal Cancer | CLINICAL CANCER RESEARCH | 2017 | 10.1158/1078-0432.CCR-17-0510 | 169 |
| How liquid biopsies can change clinical practice in oncology | ANNALS OF ONCOLOGY | 2019 | 10.1093/annonc/mdz227 | 157 |
