# Supplementary material for: Circulating tumor DNA: current implementation issues and future challenges for clinical utility
Source: publisher site journal article supplement (doi:10.1515/cclm-2023-1157), 2023-12-18
Supplement: Supplementary file 8 [file j_cclm-2023-1157_suppl_010.docx]

**Supplementary Tab9. The top 10 journals in the field of ctDNA and MRD research based on h-index from 2013 to 2022.**

| **Element** | **h_index** | **g_index** | **m_index** | **TC** | **NP** | **PY_start** |
| --- | --- | --- | --- | --- | --- | --- |
| CANCERS | 11 | 14 | 2.2 | 252 | 28 | 2019 |
| FRONTIERS IN ONCOLOGY | 9 | 14 | 1.8 | 213 | 18 | 2019 |
| CLINICAL CANCER RESEARCH | 8 | 11 | 1.143 | 508 | 11 | 2017 |
| EXPERT REVIEW OF MOLECULAR DIAGNOSTICS | 8 | 9 | 1.143 | 257 | 9 | 2017 |
| CANCER TREATMENT REVIEWS | 6 | 6 | 1.2 | 227 | 6 | 2019 |
| ANNALS OF ONCOLOGY | 5 | 5 | 0.5 | 421 | 5 | 2014 |
| BLOOD | 5 | 5 | 0.625 | 190 | 5 | 2016 |
| ESMO OPEN | 5 | 5 | 1.25 | 101 | 5 | 2020 |
| JOURNAL OF CLINICAL ONCOLOGY | 5 | 5 | 0.714 | 118 | 5 | 2017 |
| BRITISH JOURNAL OF CANCER | 4 | 5 |  | 40 | 5 |  |
