# Supplementary material for: Circulating tumor DNA: current implementation issues and future challenges for clinical utility
Source: publisher site journal article supplement (doi:10.1515/cclm-2023-1157), 2023-12-18
Supplement: Supplementary file 9 [file j_cclm-2023-1157_suppl_011.docx]

**Supplementary Tab10. Gene mutation sites involved in studies of targeted therapy and ctDNA.**

|  | **EGFR** | **KRAS** | **BRAF** | **MET** | **HER2** | **PD-1/L1** | **ALK** | **PI3K** | **PARP** | **ROS1** | **RET** | **VEGF** | **MAPK** | **NTRK** | **CDKs** | **BCL-2** | **IDH1/2** |
| --- | --- | --- | --- | --- | --- | --- | --- | --- | --- | --- | --- | --- | --- | --- | --- | --- | --- |
| 2011 | 1 | 0 | 0 | 0 | 0 | 0 | 0 | 0 | 0 | 0 | 0 | 0 | 0 | 0 | 0 | 0 | 0 |
| 2012 | 4 | 1 | 1 | 1 | 3 | 0 | 0 | 1 | 1 | 0 | 0 | 0 | 0 | 0 | 0 | 0 | 0 |
| 2013 | 4 | 2 | 1 | 1 | 2 | 0 | 0 | 0 | 0 | 0 | 0 | 1 | 0 | 0 | 0 | 0 | 0 |
| 2014 | 6 | 4 | 1 | 2 | 3 | 0 | 1 | 0 | 0 | 0 | 0 | 1 | 0 | 0 | 0 | 0 | 0 |
| 2015 | 23 | 18 | 9 | 7 | 5 | 0 | 1 | 3 | 0 | 0 | 0 | 0 | 1 | 0 | 0 | 0 | 0 |
| 2016 | 80 | 44 | 29 | 11 | 11 | 4 | 5 | 5 | 2 | 1 | 0 | 3 | 2 | 0 | 1 | 0 | 0 |
| 2017 | 154 | 80 | 34 | 28 | 17 | 15 | 25 | 8 | 4 | 4 | 7 | 3 | 4 | 0 | 1 | 0 | 0 |
| 2018 | 139 | 83 | 54 | 23 | 17 | 19 | 18 | 5 | 6 | 4 | 3 | 2 | 2 | 2 | 2 | 0 | 0 |
| 2019 | 187 | 109 | 67 | 42 | 35 | 20 | 23 | 6 | 5 | 9 | 8 | 4 | 6 | 1 | 1 | 2 | 0 |
| 2020 | 172 | 112 | 86 | 43 | 49 | 33 | 28 | 20 | 8 | 9 | 9 | 5 | 8 | 4 | 3 | 0 | 1 |
| 2021 | 170 | 107 | 75 | 48 | 48 | 37 | 29 | 21 | 15 | 4 | 2 | 4 | 3 | 5 | 3 | 1 | 1 |
| 2022 | 150 | 91 | 69 | 40 | 58 | 40 | 30 | 16 | 15 | 14 | 9 | 6 | 5 | 5 | 3 | 1 | 0 |
| Total | 1090 | 651 | 426 | 246 | 248 | 168 | 160 | 85 | 56 | 45 | 38 | 29 | 31 | 17 | 14 | 4 | 2 |
