# Supplementary material for: Circulating tumor DNA: current implementation issues and future challenges for clinical utility
Source: publisher site journal article supplement (doi:10.1515/cclm-2023-1157), 2023-12-18
Supplement: Supplementary file 10 [file j_cclm-2023-1157_suppl_012.docx]

**Supplementary Tab11. The number of studies on drug-resistant gene mutation sites and ctDNA.**

|  | **EGFR T790M** | **BRAF V600E** | **PIK3CA H1047R** | **KRAS G12C** | **PIK3CA E545K** | **ALK L1196M** | **ALK F1174L** | **MET Y1230C** |
| --- | --- | --- | --- | --- | --- | --- | --- | --- |
| 2010 | 0 | 1 | 0 | 0 | 0 | 0 | 0 | 0 |
| 2011 | 1 | 0 | 0 | 0 | 0 | 0 | 0 | 0 |
| 2012 | 1 | 0 | 0 | 0 | 0 | 0 | 0 | 0 |
| 2013 | 0 | 1 | 0 | 0 | 0 | 0 | 0 | 0 |
| 2014 | 1 | 1 | 1 | 0 | 1 | 0 | 0 | 0 |
| 2015 | 2 | 1 | 4 | 0 | 4 | 0 | 0 | 0 |
| 2016 | 21 | 7 | 0 | 2 | 0 | 1 | 0 | 0 |
| 2017 | 51 | 5 | 2 | 2 | 2 | 1 | 1 | 1 |
| 2018 | 45 | 9 | 1 | 1 | 1 | 0 | 0 | 0 |
| 2019 | 50 | 7 | 3 | 3 | 2 | 0 | 0 | 0 |
| 2020 | 35 | 18 | 1 | 0 | 3 | 0 | 1 | 1 |
| 2021 | 51 | 14 | 4 | 4 | 1 | 1 | 1 | 0 |
| 2022 | 33 | 13 | 3 | 6 | 3 | 2 | 2 | 1 |
| Total | 291 | 77 | 19 | 18 | 17 | 5 | 5 | 3 |
