# Supplementary material for: Circulating tumor DNA: current implementation issues and future challenges for clinical utility
Source: publisher site journal article supplement (doi:10.1515/cclm-2023-1157), 2023-12-18
Supplement: Supplementary file 11 [file j_cclm-2023-1157_suppl_013.docx]

**Supplementary Tab12. The top 10 journals in the field of ctDNA and immunotherapy research based on h-index from 2013 to 2022.**

| **Element** | **h_index** | **g_index** | **m_index** | **TC** | **NP** | **PY_start** |
| --- | --- | --- | --- | --- | --- | --- |
| CLINICAL CANCER RESEARCH | 15 | 17 | 1.875 | 1073 | 17 | 2016 |
| CANCERS | 13 | 17 | 2.6 | 417 | 42 | 2019 |
| JOURNAL FOR IMMUNOTHERAPY OF CANCER | 9 | 18 | 1.8 | 357 | 19 | 2019 |
| ANNALS OF ONCOLOGY | 8 | 9 | 0.889 | 727 | 9 | 2015 |
| FRONTIERS IN ONCOLOGY | 7 | 11 | 1.167 | 157 | 27 | 2018 |
| JCO PRECISION ONCOLOGY | 7 | 9 | 1 | 101 | 9 | 2017 |
| ONCOLOGIST | 7 | 11 | 1 | 245 | 11 | 2017 |
| JOURNAL OF THORACIC ONCOLOGY | 6 | 6 | 1 | 306 | 6 | 2018 |
| NATURE COMMUNICATIONS | 6 | 6 | 1 | 225 | 6 | 2018 |
| ONCOTARGET | 6 | 6 | 0.667 | 457 | 6 | 2015 |
