# Supplementary material for: Circulating tumor DNA: current implementation issues and future challenges for clinical utility
Source: publisher site journal article supplement (doi:10.1515/cclm-2023-1157), 2023-12-18
Supplement: Supplementary file 12 [file j_cclm-2023-1157_suppl_014.docx]

**Supplementary Tab13. The top 10 most cited documents of ctDNA and immunotherapy research from 2013 to 2022.**

| **Title** | **Journal** | **Publication year** | **DOI** | **Total citations** |
| --- | --- | --- | --- | --- |
| Phylogenetic ctDNA analysis depicts early-stage lung cancer evolution | NATURE | 2017 | 10.1038/nature22364 | 938 |
| Comprehensive molecular characterization of clinical responses to PD-1 inhibition in metastatic gastric cancer | NATURE MEDICINE | 2018 | 10.1038/s41591-018-0101-z | 760 |
| Artificial intelligence in cancer imaging: Clinical challenges and applications | CA-A CANCER JOURNAL FOR CLINICIANS | 2019 | 10.3322/caac.21552 | 591 |
| Early Detection of Molecular Residual Disease in Localized Lung Cancer by Circulating Tumor DNA Profiling | CANCER DISCOVERY | 2017 | 10.1158/2159-8290.CD-17-0716 | 488 |
| Management of acquired resistance to EGFR TKI-targeted therapy in advanced non-small cell lung cancer | MOLECULAR CANCER | 2018 | 10.1186/s12943-018-0777-1 | 375 |
| Assessment of Blood Tumor Mutational Burden as a Potential Biomarker for Immunotherapy in Patients With Non-Small Cell Lung Cancer With Use of a Next-Generation Sequencing Cancer Gene Panel | JAMA ONCOLOGY | 2019 | 10.1001/jamaoncol.2018.7098 | 289 |
| Early Assessment of Lung Cancer Immunotherapy Response via Circulating Tumor DNA | CLINICAL CANCER RESEARCH | 2018 | 10.1158/1078-0432.CCR-17-1341 | 233 |
| Circulating tumor DNA to monitor treatment response and detect acquired resistance in patients with metastatic melanoma | ONCOTARGET | 2015 | 10.18632/oncotarget.5788 | 225 |
| The emerging clinical relevance of genomics in cancer medicine | NATURE REVIEWS CLINICAL ONCOLOGY | 2018 | 10.1038/s41571-018-0002-6 | 220 |
| Early stage NSCLC - challenges to implementing ctDNA-based screening and MRD detection | NATURE REVIEWS CLINICAL ONCOLOGY | 2018 | 10.1038/s41571-018-0058-3 | 198 |
